# Supplementary material for: Zircon compositional systematics from Devonian oxidized I-type granitoids: examination of porphyry Cu fertility indices in the New Brunswick Appalachians, Canada
Source: Frontiers journal article supplement (doi:10.3389/feart.2024.1363029), 2024-06-03
Supplement: Table_1.xlsx [file Table_1.xlsx]

## Sheet: Metadata
Mass Spectrometer Files
File	File start time	File end time	Time file loaded	No of data points	No of channels	Channels	Samples
C:/Lab Projects/Projects 2022/Fazi Zircon TE Sept 0222/SEPT0222A.csv	2022-09-02 11:30:07.000	2022-09-02 12:11:32.825	2022-09-02 12:36:23.596	5795	26	Si29,Ca43,Sc45,Ti49,Y89,Zr90,Nb93,La139,Ce140,Pr141,Nd146,Sm147,Eu153,Gd157,Tb159,Dy163,Ho165,Er166,Tm169,Yb172,Lu175,Hf178,Ta181,Pb208,Th232,U238	SEPT0222A.d
Laser Log Files
File	File start time	File end time	Time file loaded	Samples	Offset (s)	Widths
C:/Lab Projects/Projects 2022/Fazi Zircon TE Sept 0222/SEPT0222A_log_20220902_114059.csv	2022-09-02 11:41:00.165	2022-09-02 12:21:43.446	2022-09-02 12:36:33.788	NIST610 - 1,FY-GR2A - 6,FY-GR2A - 7,91500 - 1,7022-670-675 - 1,7022-670-675 - 2,7022-670-675 - 3,NIST610 - 3,91500 - 3,NIST612 - 3,Plesovice - 3,FY-GR2A - 2,7005-350-355 - 1,7005-350-355 - 2,7005-350-355 - 3,NIST612 - 1,FY-GR1A - 1,FY-GR1A - 2,FY-GR1A - 3,Plesovice - 4,NIST612 - 4,91500 - 4,FY-GR2A - 3,NIST610 - 4,Plesovice - 1,7010-345-349 - 1,7010-345-349 - 2,700-7020-62.5 - 1,700-7020-62.5 - 2…	-627.574	17

## Sheet: DRS Settings
Data Reduction Scheme Settings
Trace Elements
DefaultRefMat
Full-Quant	TRUE
Howell	FALSE
IndexChannel	Si29
Longerich	FALSE
MaskChannel	Si29
MaskCutoff	1000
MaskMethod	Laser log
MaskResults	FALSE
MaskTrim	0
Pettke	TRUE
exceptions
Trace Elements Next
Full-Quant	TRUE
IndexChannel	Si29
MaskChannel	Si29
MaskCutoff	1000
MaskMethod	Laser log
MaskResults	FALSE
MaskTrim	0
Preserve	FALSE
UseRatios	TRUE
exceptions

## Sheet: Reference Material Values
Reference Material Values
T_BLR1
Matrix
Description	"BLR-1 (titanite), natural standard"
Data Source	Aleinikoff et al. (2007) AJS
URL
File Path	C:/Program Files (x86)/iolite-software/iolite4/ReferenceMaterials/T_BLR1.json
Notes	U/Pb information is from TIMS (Boise State) errors are 2SD
Measurement	Units	Value	Uncertainty
Skarn	unknown	0	0
Age	ratio	0	1047
206Pb/238U	ratio	0.17636	0.00023
207Pb/235U	ratio	1.806	0.004
207Pb/206Pb	ratio	0.07428	2.5e-05
c207Pb/206Pb	ratio	0.912	0.005
206Pb/204Pb	unknown	100	0
208Pb/206Pb	unknown	0.002	0
208Pb/232Th	ratio	2.02	0.16
Th/U	ratio	0	0.6
U	ppm	300	0
Th	ppm	186	0
Pb	ppm	19.7	0
T_MKED
Matrix
Description	"Titanite, Queensland natural standard"
Data Source	Spandler et al. (2015) Chemical Geology
URL
File Path	C:/Program Files (x86)/iolite-software/iolite4/ReferenceMaterials/T_MKED.json
Notes	U/Pb information is from TIMS. WDS and LAICPmS for major and trace elements. errors are 2SD
Measurement	Units	Value	Uncertainty
Skarn	unknown	0	0
Age	ratio	0	1518
206Pb/238U	ratio	0.26538	0.0244
207Pb/235U	ratio	3.4632	0.0403
207Pb/206Pb	ratio	0.096	0.0213
c207Pb/206Pb	ratio	0.954	0.002
208Pb/232Th	ratio	1.05	0.16
Th/U	ratio	0	2.8
U	ppm	131	0
Th	ppm	369	0
Mg	ppm	140	6
Sc	ppm	0.9	4
V	ppm	326	1
Cr	ppm	35	6
Mn	ppm	160	2.1
As	ppm	10.6	4.6
Sr	ppm	8.47	2.8
Y	ppm	875	3
Zr	ppm	236	2.8
Nb	ppm	923	4.3
Mo	ppm	5.86	4.5
Sn	ppm	218	3.5
La	ppm	467	3.4
Ce	ppm	2134	4
Pr	ppm	351	4
Nd	ppm	1742	4
Sm	ppm	375	3
Eu	ppm	68.6	3
Gd	ppm	304	3
Tb	ppm	44.2	3
Dy	ppm	246	3
Ho	ppm	43	3
Er	ppm	108	3
Tm	ppm	13.1	3
Yb	ppm	71	3
Lu	ppm	6.8	3
Hf	ppm	14.1	3
Ta	ppm	71	7
Pb	ppm	50.4	3
A_MAD
Matrix	Apatite
Description	Madagascar Apatite
Data Source	Thomson et al., 2012, G3
URL
File Path	C:/Program Files (x86)/iolite-software/iolite4/ReferenceMaterials/A_MAD.json
Notes
Measurement	Units	Value	Uncertainty
Age	Ma	473.46	0
206Pb/238U	ratio	0.0762416	0
207Pb/235U	ratio	0.601257	0
208Pb/232Th	ratio	0	0
207Pb/206Pb	ratio	0.0571961	0
c207Pb/206Pb	ratio	0.8681	0
206Pb/208Pb	ratio	0	0
206Pb/204Pb	ratio	0	0
207Pb/204Pb	ratio	0	0
208Pb/204Pb	ratio	0	0
Pb	ppm	51.2	0
Th	ppm	798	0
U	ppm	22.2	0
176Hf/177Hf	ratio	0	0
87Sr/86Sr	ratio	0.7118	3e-05
87Rb/86Sr	ratio	0.0001	0.0002
A_McClure
Matrix	Apatite
Description	McClure Mountain Apatite Apatite
Data Source	Schoene and Bowring, CMP, 2006
URL
File Path	C:/Program Files (x86)/iolite-software/iolite4/ReferenceMaterials/A_McClure.json
Notes
Measurement	Units	Value	Uncertainty
Age	Ma	523.51	0
206Pb/238U	ratio	0.0845981	0
207Pb/235U	ratio	0.674607	0
208Pb/232Th	ratio	0	0
207Pb/206Pb	ratio	0.0578348	0
c207Pb/206Pb	ratio	0.88198	0
206Pb/208Pb	ratio	0	0
206Pb/204Pb	ratio	0	0
207Pb/204Pb	ratio	0	0
208Pb/204Pb	ratio	0	0
Pb	ppm	0	0
Th	ppm	71	0
U	ppm	23	0
176Hf/177Hf	ratio	0	0
C_MMC
Matrix	CaCO3
Description	Modern Marine Carbonate
Data Source	a bunch of shells from your local beach
URL	http://www.awebpageforthisstandardifappropriate.org
File Path	C:/Program Files (x86)/iolite-software/iolite4/ReferenceMaterials/C_MMC.json
Notes	Any further notes about the standard can be entered here
Measurement	Units	Value	Uncertainty
87Sr_86Sr	ratio	0.709163	2e-05
NIST1632d
Matrix	Coal
Description	Trace elements in coal
Data Source	NIST certificate
URL
File Path	C:/Program Files (x86)/iolite-software/iolite4/ReferenceMaterials/NIST1632d.json
Notes	"GEOREM preferred values, as at 050509. Uncertainties for some major elements have not been included"
Measurement	Units	Value	Uncertainty
Al	ppm	9120	50
As	ppm	6.1	0.2
B	ppm	62	1
Ba	ppm	40.42	0.89
C	ppm	768800	1500
Ca	ppm	14400	30
Cd	ppm	0.08	0.01
Ce	ppm	11.7	0.4
Cl	ppm	1142	11
Co	ppm	3.424	0.048
Cr	ppm	13.7	0.1
Cs	ppm	0.598	0.006
Cu	ppm	5.83	0.31
Eu	ppm	0.217	0.006
Fe	ppm	7490	160
Hg	ppm	0.0928	0.0033
K	ppm	1094	26
Mg	ppm	390	6
Mn	ppm	13.1	0.4
N	ppm	15900	100
Na	ppm	296.9	4.2
Pb	ppm	3.845	0.042
Rb	ppm	7.36	0.2
S	ppm	14620	740
Sb	ppm	0.445	0.015
Sc	ppm	2.89	0.03
Se	ppm	1.29	0.03
Si	ppm	16500	300
Sr	ppm	63.5	1.2
Th	ppm	1.428	0.035
Ti	ppm	477	10
U	ppm	0.517	0.012
V	ppm	23.74	0.1
Zn	ppm	12.9	1.2
G_BCR2G
Matrix	Glass
Description	Natural glass, basaltic composition
Data Source	GeoRem database as of 2018-07-09
URL
File Path	C:/Program Files (x86)/iolite-software/iolite4/ReferenceMaterials/G_BCR2G.json
Notes	GEOREM preferred values. Uncertainties for some major elements have not been included, otherwise 2 sd Values for isotope ratios come from various sources. Please review all values before using them.
Measurement	Units	Value	Uncertainty
Ag	ppm	0.5	0.4
Al	ppm	70913	0
Ba	ppm	683	7
Be	ppm	2.3	0.4
Bi	ppm	0.05	0.01
Ca	ppm	50429	0
Cd	ppm	0.2	0
Ce	ppm	53.3	0.5
Co	ppm	38	2
Cr	ppm	17	2
Cs	ppm	1.16	0.07
Cu	ppm	21	5
Dy	ppm	6.44	0.06
Er	ppm	3.7	0.04
Eu	ppm	1.97	0.02
Fe	ppm	96385	0
Ga	ppm	23	1
Gd	ppm	6.71	0.07
Ge	ppm	1.5	0.1
Hf	ppm	4.84	0.28
Ho	ppm	1.27	0.08
In	ppm	0.11	0.02
K	ppm	14900	150
La	ppm	24.7	0.3
Li	ppm	9	1
Lu	ppm	0.503	0.005
Mg	ppm	21467	0
Mn	ppm	1550	70
Mo	ppm	270	30
Na	ppm	23962	0
Nb	ppm	12.5	1
Nd	ppm	28.9	0.3
Ni	ppm	13	2
P	ppm	1615	0
Pb	ppm	11	1
Pr	ppm	6.7	0.4
Pt	ppm	0.78	0.6
Rb	ppm	47	0.5
Re	ppm	0.0062	0.0007
Sb	ppm	0.35	0.08
Sc	ppm	33	2
Si	ppm	254270	0
Sm	ppm	6.59	0.07
Sn	ppm	2.6	0.4
Sr	ppm	342	4
Ta	ppm	0.78	0.06
Tb	ppm	1.02	0.08
Th	ppm	5.9	0.3
Ti	ppm	14100	1000
Tl	ppm	0.3	0.1
Tm	ppm	0.51	0.04
U	ppm	1.69	0.12
V	ppm	425	18
W	ppm	0.5	0.07
Y	ppm	35	3
Yb	ppm	3.39	0.03
Zn	ppm	125	5
Zr	ppm	184	15
206Pb/204Pb	ppm	18.765	0
207Pb/204Pb	ppm	15.626	0
207Pb/206Pb	ppm	0.833	0
208Pb/204Pb	ppm	38.73	0
208Pb/206Pb	ppm	2.066	0
230Th/232Th	unknown	4.724e-06	0
[230Th/232Th]	ppm	0.877	0
234U/238U	unknown	5.493e-05	0
[234U/238U]	ppm	1.001	0
87Sr/86Sr	ppm	0.705003	0
d7Li	ppm	4.5	0.6
G_BHVO2G
Matrix	Glass
Description	Natural glass, basaltic composition
Data Source	GeoRem database as of 2018-07-09
URL
File Path	C:/Program Files (x86)/iolite-software/iolite4/ReferenceMaterials/G_BHVO2G.json
Notes	GEOREM preferred values. Uncertainties for some major elements have not been included, otherwise 2 sd Values for isotope ratios come from various sources. Please review all values before using them.
Measurement	Units	Value	Uncertainty
Al	ppm	71971	0
Ba	ppm	131	2
Be	ppm	1.3	0.2
Bi	ppm	0.01	0.002
Ca	ppm	81430	0
Cd	ppm	0.1	0.02
Ce	ppm	37.6	0.2
Co	ppm	44	2
Cr	ppm	293	12
Cs	ppm	0.1	0.02
Cu	ppm	127	11
Dy	ppm	5.28	0.05
Er	ppm	2.56	0.02
Eu	ppm	2.07	0.01
Fe	ppm	87835	0
Ga	ppm	22	3
Gd	ppm	6.16	0.05
Ge	ppm	1.6	0.1
Hf	ppm	4.32	0.18
Ho	ppm	0.98	0.04
In	ppm	0.1	0.02
K	ppm	4270	50
La	ppm	15.2	0.2
Li	ppm	4.4	0.8
Lu	ppm	0.279	0.003
Mg	ppm	42994	0
Mn	ppm	1317	0
Mo	ppm	3.8	0.2
Na	ppm	17806	0
Nb	ppm	18.3	0.8
Nd	ppm	24.5	0.2
Ni	ppm	116	7
P	ppm	1266	0
Pb	ppm	1.7	0.2
Pr	ppm	5.35	0.22
Pt	ppm	0.46	0.09
Rb	ppm	9.2	0.04
Re	ppm	0.00047	0.00013
Sb	ppm	0.3	0.13
Sc	ppm	33	2
Si	ppm	230428	0
Sm	ppm	6.1	0.03
Sn	ppm	2.6	0.6
Sr	ppm	396	1
Ta	ppm	1.15	0.1
Tb	ppm	0.92	0.04
Th	ppm	1.22	0.05
Ti	ppm	16300	900
Tm	ppm	0.34	0.02
U	ppm	0.403	0.003
V	ppm	308	19
W	ppm	0.23	0.04
Y	ppm	26	2
Yb	ppm	2.01	0.02
Zn	ppm	102	6
Zr	ppm	170	7
206Pb/204Pb	ratio	18.733	0
207Pb/204Pb	ratio	15.571	0
208Pb/204Pb	ratio	38.27	0
87Sr/86Sr	ratio	0.703469	0
G_GSD1G
Matrix	Glass
Description	Synthetic Basalt Glass from USGS
Data Source	GeoRem database as of 2018-07-09
URL
File Path	C:/Program Files (x86)/iolite-software/iolite4/ReferenceMaterials/G_GSD1G.json
Notes	GEOREM preferred values, as at 131014 Values for isotope ratios come from various sources. Please review all values before using them.
Measurement	Units	Value	Uncertainty
Ag	ppm	23	3
Al	ppm	70919.5	0
As	ppm	27	8
Au	ppm	4	0
B	ppm	50	20
Ba	ppm	67	1
Be	ppm	46	5
Bi	ppm	35	4
Ca	ppm	51458.4	0
Cd	ppm	18	4
Ce	ppm	41.4	0.4
Co	ppm	40	2
Cr	ppm	42	3
Cs	ppm	32	2
Cu	ppm	42	2
Dy	ppm	51.2	0.5
Er	ppm	40.1	0.4
Eu	ppm	41	2
Fe	ppm	103382	0
Ga	ppm	54	7
Gd	ppm	50.7	0.5
Ge	ppm	32	8
Hf	ppm	39	2
Ho	ppm	49	2
In	ppm	38	5
K	ppm	25300	300
La	ppm	39.1	0.4
Li	ppm	43	6
Lu	ppm	51.5	0.5
Mg	ppm	21711.6	0
Mn	ppm	220	20
Mo	ppm	39	3
Na	ppm	26707	0
Nb	ppm	42	3
Nd	ppm	44.7	0.5
Ni	ppm	58	4
P	ppm	860	160
Pb	ppm	50	2
Pr	ppm	45	1
Pt	ppm	6	0
Rb	ppm	37.3	0.4
Sb	ppm	43	7
Sc	ppm	52	2
Se	ppm	2	1
Si	ppm	248678	0
Sm	ppm	47.8	0.5
Sn	ppm	29	6
Sr	ppm	69.4	0.7
Ta	ppm	40	4
Tb	ppm	47	2
Th	ppm	41	2
Ti	ppm	7433.92	0
Tl	ppm	0.9	0.1
Tm	ppm	49	2
U	ppm	41	2
V	ppm	44	2
W	ppm	43	4
Y	ppm	42	2
Yb	ppm	50.9	0.5
Zn	ppm	54	2
Zr	ppm	42	2
143Nd/144Nd	ratio	0.511521	0
176Hf/177Hf	ratio	0.282121	0
206Pb/204Pb	ratio	19.579	0
207Pb/204Pb	ratio	15.745	0
207Pb/206Pb	ratio	0.80418	0
208Pb/204Pb	ratio	38.908	0
208Pb/206Pb	ratio	1.9871	0
234U/238U	ratio	1.798	0
238U/235U	ratio	271.4	0
87Sr/86Sr	ratio	0.709416	0
d11B	ratio	10.1	0
d29Si	ratio	-0.12	0
d30Si	ratio	-0.21	0
d44/40Ca	ratio	0.86	0
d7Li	ratio	30.9	1
G_GSE1Ga
Matrix	Glass
Description	"GSE-1G glass, nominal 400 ppm for many elements"
Data Source	GeoRem database as of Dec09
URL
File Path	C:/Program Files (x86)/iolite-software/iolite4/ReferenceMaterials/G_GSE1Ga.json
Notes	These are the preferred values from GEOREM. All uncertainties are 95%CL or 2 SD. Uncertainties for some major elements have not been included.
Measurement	Units	Value	Uncertainty
Ag	ppm	200	20
Al	ppm	68802.5	2117
As	ppm	260	90
Au	ppm	7	0
B	ppm	330	120
Ba	ppm	427	5
Be	ppm	490	80
Bi	ppm	320	30
Ca	ppm	52888	2144
Cd	ppm	160	50
Ce	ppm	414	4
Co	ppm	380	20
Cr	ppm	400	80
Cs	ppm	310	20
Cu	ppm	380	40
Dy	ppm	524	6
Er	ppm	595	6
Eu	ppm	410	20
Fe	ppm	98718	2332
Ga	ppm	490	70
Gd	ppm	514	6
Ge	ppm	320	80
Hf	ppm	395	7
Ho	ppm	501	8
In	ppm	370	60
Ir	ppm	120	0
K	ppm	21800	200
La	ppm	392	4
Li	ppm	430	60
Lu	ppm	518	6
Mg	ppm	21109	181
Mn	ppm	590	20
Mo	ppm	390	30
Na	ppm	28933	148
Nb	ppm	420	40
Nd	ppm	453	5
Ni	ppm	440	30
P	ppm	70	20
Pb	ppm	378	12
Pr	ppm	460	10
Pt	ppm	30	0
Rb	ppm	356	4
Re	ppm	120	0
Sb	ppm	450	110
Sc	ppm	530	20
Se	ppm	20	16
Si	ppm	251015	7000
Sm	ppm	488	5
Sn	ppm	280	50
Sr	ppm	447	5
Ta	ppm	390	40
Tb	ppm	480	20
Th	ppm	380	20
Ti	ppm	450	42
Tl	ppm	2	0.2
Tm	ppm	500	20
U	ppm	420	30
V	ppm	440	20
W	ppm	430	50
Y	ppm	410	30
Yb	ppm	520	5
Zn	ppm	460	10
Zr	ppm	410	30
206Pb/238U	ratio	0.2735	0.0031
207Pb/235U	ratio	59.15	0.84
206Pb/204Pb	ratio	19.925	0.002
207Pb/204Pb	ratio	15.787	0.001
207Pb/206Pb	ratio	0.79232	2e-05
208Pb/204Pb	ratio	39.145	0.003
208Pb/206Pb	ratio	1.9646	0.0001
208Pb/232Th	ratio	0.5917	0.0005
238U/235U	ratio	273	1
G_MACS-3
Matrix	Glass
Description	synthetic carbonate standard
Data Source	USGS certificate
URL
File Path	C:/Program Files (x86)/iolite-software/iolite4/ReferenceMaterials/G_MACS-3.json
Notes	"GEOREM preferred values, as at 050509. Uncertainties for some major elements have not been included"
Measurement	Units	Value	Uncertainty
Ag	ppm	53.3	1.8
As	ppm	44.2	1.4
Ba	ppm	58.8	2
Br	ppm	0.44	0
Be	ppm	56.4	1.7
Bi	ppm	19.9	1.6
C	ppm	119600	0
Ca	ppm	369370	0
Cd	ppm	54.6	2.2
Ce	ppm	11.2	0.33
Cl	ppm	61	2
Co	ppm	57.1	2
Cr	ppm	117	5
Cu	ppm	120	5
Dy	ppm	10.7	0.5
Er	ppm	11.2	0.22
Eu	ppm	11.8	0.13
Fe	ppm	11191	0
Ga	ppm	16.1	1.1
Gd	ppm	10.8	0.3
Ge	ppm	56.9	4
Hf	ppm	4.73	0.21
Hg	ppm	10.2	0.4
Ho	ppm	11.3	0.14
I	ppm	20.3	0
K	ppm	16	2
La	ppm	10.4	0.5
Li	ppm	62.2	4.2
Lu	ppm	10.8	0.3
Mg	ppm	1756	136
Mn	ppm	536	28
Mo	ppm	1.21	0.14
Na	ppm	5935	0
Nb	ppm	35.2	3.1
Nd	ppm	11	0.41
Ni	ppm	57.4	4.9
Pd	ppm	3.4	0
Pb	ppm	56.5	1.8
Pr	ppm	12.1	0.23
Pt	ppm	17.8	0
Sb	ppm	20.6	1.1
Sc	ppm	21	0.8
Sm	ppm	11	0.27
Sn	ppm	58.1	8.8
Sr	ppm	6760	350
Ta	ppm	20.5	5.3
Tb	ppm	10.9	0.09
Th	ppm	55.4	1.1
Ti	ppm	54.9	0.18
Tl	ppm	14.2	1.7
Tm	ppm	11.9	0.26
U	ppm	1.52	0.04
V	ppm	46.3	1.13
W	ppm	2.16	0.19
Y	ppm	22.4	0.9
Yb	ppm	11.6	0.2
Zn	ppm	111	5.7
Zr	ppm	8.67	0.63
G_MACS-3GR
Matrix	Glass
Description	synthetic carbonate standard
Data Source	GEOREM preferred values
URL
File Path	C:/Program Files (x86)/iolite-software/iolite4/ReferenceMaterials/G_MACS-3GR.json
Notes	"GEOREM preferred values, as at 050509. Uncertainties for some major elements have not been included"
Measurement	Units	Value	Uncertainty
Ag	ppm	54.5	1.6
Al	ppm	396	31
As	ppm	46.6	3.3
Au	ppm	7.21	0.13
B	ppm	8.2	1.1
Ba	ppm	59.6	1.4
Be	ppm	57.4	1.3
Bi	ppm	20.6	1
Br	ppm	0.44	0
Ca	ppm	376900	0
Cd	ppm	53.9	1.4
Ce	ppm	10.9	0.3
Cl	ppm	61	0
Co	ppm	55.3	1.9
Cr	ppm	114	4
Cs	ppm	0.013	0
Cu	ppm	116	4
Dy	ppm	9.9	0.8
Er	ppm	10.3	0.8
Eu	ppm	11.1	0.5
Fe	ppm	10500	600
Ga	ppm	15.6	0.8
Gd	ppm	9.72	0.84
Ge	ppm	55.7	1.7
Hf	ppm	4.57	0.11
Hg	ppm	10.2	0
Ho	ppm	10.3	0.8
In	ppm	0.2	0
K	ppm	1.1	0
La	ppm	10.6	0.2
Li	ppm	62.9	2.1
Lu	ppm	10	0.7
Mg	ppm	1720	100
Mn	ppm	512	25
Na	ppm	5850	470
Nb	ppm	42.9	0
Nd	ppm	10.6	0.4
Ni	ppm	56.2	1.2
P	ppm	103	8
Pb	ppm	59.7	3.2
Pd	ppm	3.4	0
Pr	ppm	11.5	0.5
Pt	ppm	17.8	0
Rb	ppm	0.04	0
Ru	ppm	20.1	0
Sb	ppm	20.3	0.4
Sc	ppm	20.3	1
Si	ppm	400	0
Sm	ppm	10.3	0.7
Sn	ppm	54.4	5.2
Sr	ppm	6640	170
Ta	ppm	20.1	0.6
Tb	ppm	9.49	0.6
Th	ppm	51.9	3.9
Ti	ppm	53.1	4.7
Tl	ppm	15.3	1.5
Tm	ppm	10.4	0.7
U	ppm	1.41	0.09
V	ppm	44.8	1.2
W	ppm	2.15	0.01
Y	ppm	20.7	1.5
Yb	ppm	10.2	0.7
Zn	ppm	124	21
Zr	ppm	8.5	0.2
G_NIST610
Matrix	Glass
Description	NIST 610 glass
Data Source	GeoRem database as of 2018-07-09
URL
File Path	C:/Program Files (x86)/iolite-software/iolite4/ReferenceMaterials/G_NIST610.json
Notes	GEOREM preferred values, as at 050509. Uncertainties for some major elements have not been included Values for isotope ratios come from various sources. Please review all values before using them.
Measurement	Units	Value	Uncertainty
Ag	ppm	251	9
Al	ppm	10797	0
As	ppm	325	18
Au	ppm	23.6	1.7
B	ppm	350	56
Ba	ppm	452	9
Be	ppm	476	31
Bi	ppm	384	26
Ca	ppm	82144	0
Cd	ppm	270	16
Ce	ppm	453	8
Cl	ppm	274	67
Co	ppm	410	10
Cr	ppm	408	10
Cs	ppm	366	9
Cu	ppm	441	15
Dy	ppm	437	11
Er	ppm	455	14
Eu	ppm	447	12
F	ppm	304	0
Fe	ppm	458	9
Ga	ppm	433	13
Gd	ppm	449	12
Ge	ppm	447	78
Hf	ppm	435	12
Ho	ppm	449	12
In	ppm	434	19
K	ppm	464	21
La	ppm	440	10
Li	ppm	468	24
Lu	ppm	439	8
Mg	ppm	432	29
Mn	ppm	444	13
Mo	ppm	417	21
Na	ppm	99415	0
Nb	ppm	465	34
Nd	ppm	430	8
Ni	ppm	458.7	4
P	ppm	413	46
Pb	ppm	426	1
Pd	ppm	1.21	0.44
Pr	ppm	448	7
Pt	ppm	3.12	0.08
Rb	ppm	425.7	1
Re	ppm	49.9	3.7
Rh	ppm	1.29	0.07
S	ppm	575	32
Sb	ppm	396	19
Sc	ppm	455	10
Se	ppm	138	42
Si	ppm	327180	0
Sm	ppm	453	11
Sn	ppm	430	29
Sr	ppm	515.5	1
Ta	ppm	446	33
Te	ppm	302	0
Tb	ppm	437	9
Th	ppm	457.2	1
Ti	ppm	452	10
Tl	ppm	59.6	2.8
Tm	ppm	435	10
U	ppm	461.5	1
V	ppm	450	9
W	ppm	444	29
Y	ppm	462	11
Yb	ppm	450	9
Zn	ppm	460	18
Zr	ppm	448	9
Zr	ppm	448	9
11B/10B	ratio	4.049	0
143Nd/144Nd	ratio	0.511927	0
206Pb/204Pb	ratio	17.045	0
207Pb/204Pb	ratio	15.504	0
207Pb/206Pb	ratio	0.9096	0
208Pb/204Pb	ratio	36.964	0
208Pb/206Pb	ratio	2.168	0
87Sr/86Sr	ratio	0.709699	0
d7Li	ratio	32.5	0
G_NIST612
Matrix	Glass
Description	NIST 612 glass, nominal 40 ppm for many elements
Data Source	GeoRem database as of 2018-07-09
URL
File Path	C:/Program Files (x86)/iolite-software/iolite4/ReferenceMaterials/G_NIST612.json
Notes	These are the preferred values of NIST 612 from GEOREM. All uncertainties are 95%CL or 2 SD. Uncertainties for some major elements have not been included. Values for isotope ratios come from various sources. Please review all values before using them.
Measurement	Units	Value	Uncertainty
Ag	ppm	22	0.3
Al	ppm	11167	0
As	ppm	35.7	5.5
Au	ppm	4.77	0.31
B	ppm	34.3	1.7
Ba	ppm	39.3	0.9
Be	ppm	37.5	1.5
Bi	ppm	30.2	2.3
Ca	ppm	85002	0
Cd	ppm	28.1	1.1
Ce	ppm	38.4	0.7
Cl	ppm	142	58
Co	ppm	35.5	1
Cr	ppm	36.4	1.5
Cs	ppm	42.7	1.8
Cu	ppm	37.8	1.5
Dy	ppm	35.5	0.7
Er	ppm	38	0.9
Eu	ppm	35.6	0.8
F	ppm	80	89
Fe	ppm	51	2
Ga	ppm	36.9	1.5
Gd	ppm	37.3	0.9
Ge	ppm	36.1	3.8
Hf	ppm	36.7	1.2
Ho	ppm	38.3	0.8
In	ppm	38.9	2.1
K	ppm	62.3	2.4
La	ppm	36	0.7
Li	ppm	40.2	1.3
Lu	ppm	37	0.9
Mg	ppm	68	5.1
Mn	ppm	38.7	0.9
Mo	ppm	37.4	1.5
Na	ppm	103858	0
Nb	ppm	38.9	2.1
Nd	ppm	35.5	0.7
Ni	ppm	38.8	0.2
P	ppm	46.6	6.9
Pb	ppm	38.57	0.2
Pd	ppm	1.05	0.1
Pr	ppm	37.9	1
Pt	ppm	2.51	0.1
Rb	ppm	31.4	0.4
Re	ppm	6.63	0.61
Rh	ppm	0.91	0.02
S	ppm	377	70
Sb	ppm	34.7	1.8
Sc	ppm	39.9	2.5
Si	ppm	336061	0
Sm	ppm	37.7	0.8
Sn	ppm	38.6	1.3
Sr	ppm	78.4	0.2
Ta	ppm	37.6	1.9
Tb	ppm	37.6	1.1
Th	ppm	37.79	0.08
Ti	ppm	44	2.3
Tl	ppm	14.9	0.5
Tm	ppm	36.8	0.6
U	ppm	37.38	0.08
V	ppm	38.8	1.2
W	ppm	38	1.1
Y	ppm	38.3	1.4
Yb	ppm	39.2	0.9
Zn	ppm	39.1	1.7
Zr	ppm	37.9	1.2
11B/10B	ratio	4.048	0
143Nd/144Nd	ratio	0.51193	0
206Pb/204Pb	ratio	17.095	0
207Pb/204Pb	ratio	15.511	0
207Pb/206Pb	ratio	0.9073	0
208Pb/204Pb	ratio	37.005	0
208Pb/206Pb	ratio	2.1647	0
87Sr/86Sr	ratio	0.709063	0
d7Li	ratio	31.2	0
NIST2167
Matrix	Glass
Description	NIST 610 glass
Data Source	GeoRem database as of Dec09
URL
File Path	C:/Program Files (x86)/iolite-software/iolite4/ReferenceMaterials/NIST2167.json
Notes	"GEOREM preferred values, as at 050509. Uncertainties for some major elements have not been included"
Measurement	Units	Value	Uncertainty
Ag	ppm	7	1
Al	ppm	45	5
As	ppm	5	1
C	ppm	510	20
Co	ppm	50	2
Cr	ppm	15	5
Cu	ppm	14	2
Fe	ppm	997472	0
Mn	ppm	220	10
Mo	ppm	200	10
Nb	ppm	95	3
Ni	ppm	20	10
P	ppm	31	2
S	ppm	87.31	0.6
Sb	ppm	20	5
Si	ppm	260	30
Sn	ppm	60	10
Ti	ppm	100	10
V	ppm	330	10
NIST364
Matrix	Glass
Description	NIST 610 glass
Data Source	GeoRem database as of Dec09
URL
File Path	C:/Program Files (x86)/iolite-software/iolite4/ReferenceMaterials/NIST364.json
Notes	"GEOREM preferred values, as at 050509. Uncertainties for some major elements have not been included"
Measurement	Units	Value	Uncertainty
As	ppm	520	50
Au	ppm	1	1
B	ppm	106	1
C	ppm	8700	100
Ca	ppm	0.3	0
Ce	ppm	5.7	0.5
Co	ppm	1500	100
Cr	ppm	630	50
Cu	ppm	2490	50
Fe	ppm	967245	100
Mg	ppm	1.6	1
Mn	ppm	2550	50
Mo	ppm	4900	100
Nb	ppm	1570	50
Nd	ppm	1.8	1
Ni	ppm	1440	50
P	ppm	100	100
Pb	ppm	230	5
S	ppm	250	3
Si	ppm	650	50
Sb	ppm	340	10
Sn	ppm	80	10
Ta	ppm	1100	100
Ti	ppm	2400	400
V	ppm	1050	50
W	ppm	1000	100
Zr	ppm	680	10
G_Au_31
Matrix	Gold
Description	Gold TE Standard
Data Source	Aurubis Standards
URL
File Path	C:/Program Files (x86)/iolite-software/iolite4/ReferenceMaterials/G_Au-31.json
Notes	Aurubis Standards
Measurement	Units	Value	Uncertainty
Ag	ppm	54500	100
As	ppm	112	2
Au	ppm	938000	1000
Bi	ppm	100	2
Cd	ppm	82	2
Co	ppm	124	4
Cr	ppm	25	1
Cu	ppm	1062	25
Fe	ppm	806	4.5
Mn	ppm	62	1
Ni	ppm	1092	12
Pb	ppm	90	3.5
Pd	ppm	1112	16
Pt	ppm	1152	16
Sb	ppm	102	4.8
Se	ppm	114	9
Sn	ppm	772	7.5
Te	ppm	112	16
Zn	ppm	114	6.5
G_MASS1
Matrix	Pressed pellet (Fe-S-Zn)
Description	PS-1 / MASS-1 prepared by USGS (2002)
Data Source	Wilson et al. (2002) in JAAS & S.-J. Barnes (UQAC) working values from compilation (April 2011)
URL
File Path	C:/Program Files (x86)/iolite-software/iolite4/ReferenceMaterials/G_MASS1.json
Notes	Other elements present but not analysed by Wilson are estimated at UQAC using LA-ICP-MS (NIST612 and Laflamme)
Measurement	Units	Value	Uncertainty
Ag	ppm	67	0
As	ppm	65	0
Au	ppm	47	0
Bi	ppm	66	0.9
Cd	ppm	70	0
Co	ppm	67	0
Cr	ppm	37	0
Cu	ppm	134000	0
Fe	ppm	156000	0
Ga	ppm	50	0
Ge	ppm	50	0
Hg	ppm	57	0
In	ppm	50	0
Ir	ppm	94.6	9.95
Mn	ppm	260	0
Mo	ppm	61	0
Na	ppm	25080	0
Ni	ppm	97	1
Pb	ppm	80	0.94
Pt	ppm	83.5	7.94
S	ppm	276000	0
Sb	ppm	55	0
Se	ppm	53	0
Sn	ppm	55	0
Te	ppm	21.1	0.56
Tl	ppm	50	0
V	ppm	63	0
W	ppm	23	1.7
Zn	ppm	207383	0
Po724
Matrix	Pyrrhotite
Description	Pyrrhotite PGE standard
Data Source	GeoRem database as of Dec09
URL
File Path	C:/Program Files (x86)/iolite-software/iolite4/ReferenceMaterials/Po724.json
Notes	"GEOREM preferred values, as at 050509. Uncertainties for some major elements have not been included"
Measurement	Units	Value	Uncertainty
Au	ppm	47.3	2.4
Fe	ppm	608600	2300
Ir	ppm	36.9	0.5
Os	ppm	35.2	1.9
Pd	ppm	45	0.8
Pt	ppm	35.9	0.7
Rh	ppm	37	1.7
Ru	ppm	37	1
S	ppm	390200	1600
A_MBH66
Matrix	Wrought Copper
Description	Wrought Copper
Data Source	MBH Analytical Ltd certificate
URL
File Path	C:/Program Files (x86)/iolite-software/iolite4/ReferenceMaterials/A_MBH66.json
Notes	TBA
Measurement	Units	Value	Uncertainty
Ag	ppm	57	5
As	ppm	383	6
Bi	ppm	47	3
Co	ppm	308	7
Cu	ppm	985000	0
Fe	ppm	30	4
Ni	ppm	487	5
Pb	ppm	54	5
Sb	ppm	52	3
Se	ppm	28	3
Sn	ppm	448	12
Te	ppm	32	4
Zn	ppm	287	9
Cd	ppm	139	3
S	ppm	28	3
Ge	ppm	29	4
Cr	ppm	12	2
P	ppm	147	10
Au	ppm	16	2
In	ppm	437	12
A_MBH69
Matrix	Wrought Copper
Description	Wrought Copper
Data Source	MBH Analytical Ltd certificate
URL
File Path	C:/Program Files (x86)/iolite-software/iolite4/ReferenceMaterials/A_MBH69.json
Notes	TBA
Measurement	Units	Value	Uncertainty
Ag	ppm	349	8
As	ppm	98	6
Bi	ppm	376	15
Co	ppm	36	2
Cu	ppm	985000	0
Fe	ppm	30	4
Ni	ppm	190	6
Pb	ppm	225	7
Sb	ppm	362	10
Se	ppm	127	7
Sn	ppm	106	7
Te	ppm	153	6
Zn	ppm	65	2
Cd	ppm	28	1
S	ppm	112	7
Ge	ppm	123	6
Cr	ppm	2	2
P	ppm	119	3
Au	ppm	80	4
In	ppm	90	3
A_MBH72
Matrix	Wrought Copper
Description	Wrought Copper
Data Source	MBH Analytical Ltd certificate
URL
File Path	C:/Program Files (x86)/iolite-software/iolite4/ReferenceMaterials/A_MBH72.json
Notes	TBA
Measurement	Units	Value	Uncertainty
Al	ppm	118	10
Ag	ppm	214	14
As	ppm	203	8
Bi	ppm	240	12
Co	ppm	102	8
Cu	ppm	985000	0
Fe	ppm	450	4
Mn	ppm	55	7
Ni	ppm	537	16
Pb	ppm	2930	50
Sb	ppm	217	5
Se	ppm	103	8
Sn	ppm	1800	40
Te	ppm	208	19
Zn	ppm	1070	20
Cd	ppm	13	1
S	ppm	252	14
P	ppm	45	4
Au	ppm	15	4
In	ppm	241	11
Z_91500
Matrix	Zircon
Description	91500 Zircon, natural standard
Data Source	Wiedenbeck et al. 95, Geostandards Newsletter 19, 1-23, plus GEOREM database as of Dec09, and Woodhead & Hergt, 2005 Geostandards 29, 183-195 for Hf data
URL
File Path	C:/Program Files (x86)/iolite-software/iolite4/ReferenceMaterials/Z_91500.json
Notes	204-based ratios are approximate, 207/235 value here calculated from 238/235 natural, not as reported in Wiedenbeck et al!
Measurement	Units	Value	Uncertainty
Age	Ma	1065	0
Ba	ppm	0.06	0
Ce	ppm	2.6	0
Cr	ppm	1.5	0
Dy	ppm	12	0
Er	ppm	25	0
Eu	ppm	0.24	0
Gd	ppm	2.2	0
Hf	ppm	5900	0
Ho	ppm	4.8	0
La	ppm	0.006	0
Lu	ppm	13	0
Nb	ppm	0.79	0
Nd	ppm	0.24	0
Ni	ppm	0.07	0
P	ppm	24	0
Pb	ppm	15	0
Pr	ppm	0.024	0
Si	ppm	152840	0
Sm	ppm	1	0
Sr	ppm	0.052	0
Ta	ppm	1	0
Tb	ppm	0.86	0
Th	ppm	30	0
Tl	ppm	6	0
Tm	ppm	6.9	0
U	ppm	80	0
Y	ppm	140	0
Yb	ppm	74	0
176Hf/177Hf	ratio	0.282306	0
206Pb/238U	ratio	0.17917	0
207Pb/235U	ratio	1.84983	0
208Pb/232Th	ratio	0.05374	0
207Pb/206Pb	ratio	0.07488	0
207Pb/206Pb(i)	ratio	0.9142	0
206Pb/208Pb	ratio	9.35454	0
206Pb/204Pb	ratio	10000	0
207Pb/204Pb	ratio	749	0
208Pb/204Pb	ratio	1069	0
Z_FC1
Matrix	Zircon
Description	"FC1 Zircon, natural standard"
Data Source	Ian Williams, personal communication
URL
File Path	C:/Program Files (x86)/iolite-software/iolite4/ReferenceMaterials/Z_FC1.json
Notes	204-based ratios are approximate, 207/235 value here calculated from 238/235 natural, not as reported in Wiedenbeck et al!
Measurement	Units	Value	Uncertainty
Age	ratio	0	1099
206Pb/238U	ratio	0.1859	0.0004
207Pb/235U	ratio	1.952	0.006
207Pb/206Pb	ratio	0.07615	0.00012
208Pb/232Th	ratio	0.056	0.00012
206Pb/204Pb	ratio	10000	0
207Pb/204Pb	ratio	749	0
208Pb/204Pb	ratio	1069	0
Th/U	ratio	0	0.55
Z_GJ1
Matrix	Zircon
Description	Gemoc GJ 1 Zircon, natural standard
Data Source	NIGL ID_TIMS data from D.Condon; 208/232 (model) data from Jackson et al. 2004 Chem Geol 211, 47-69. Hf data from More et al. 2008 Chem Geol 255, 231-235; Trace element data from Liu et al., 2010, Chi. Sci.Bull.55
URL
File Path	C:/Program Files (x86)/iolite-software/iolite4/ReferenceMaterials/Z_GJ1.json
Notes	204-based ratios are approximate, 207/235 value here calculated from 238/235 natural (137.88), errors are 2SD
Measurement	Units	Value	Uncertainty
Age	Ma	602	0.7
Ce	ppm	16	0
Dy	ppm	19.9	0
Er	ppm	29.3	0
Eu	ppm	1	0
Gd	ppm	6.9	0
Hf	ppm	6558	0
Ho	ppm	6.81	0
La	ppm	0.005	0
Lu	ppm	13.1	0
Nb	ppm	1.51	0
Nd	ppm	0.59	0
Pb	ppm	25.7	0
Pr	ppm	0.03	0
Si	ppm	0	0
Sm	ppm	1.42	0
Tb	ppm	1.95	0
Th	ppm	9.51	0
Ti	ppm	3.55	0
Tm	ppm	6.25	0
U	ppm	287	0
Y	ppm	246	0
Yb	ppm	62	0
Zr	ppm	431400	0
176Hf/177Hf	ratio	0.282	0
206Pb/238U	ratio	0.097853	0
207Pb/235U	ratio	0.814995	0
208Pb/232Th	ratio	0.03074	0
207Pb/206Pb	ratio	0.060139	0
206Pb/208Pb	ratio	88.08	0
206Pb/204Pb	ratio	71975	0
207Pb/204Pb	ratio	7430.5	0
208Pb/204Pb	ratio	0	0
Z_Maniitsoq
Matrix	Zircon
Description	“natural zircon, Greenland“
Data Source	“Jeffrey Marsh, Laurentian University.”
URL
File Path	C:/Program Files (x86)/iolite-software/iolite4/ReferenceMaterials/Z_Maniitsoq.json
Notes
Measurement	Units	Value	Uncertainty
Age	Ma	3008.9	0.66
206Pb/238U	ratio	0.59095	0
207Pb/235U	ratio	18.2006	0.40528
207Pb/206Pb	ratio	0.223719	0.00138
U	ratio	0	141
Th	ratio	0	154
Hf	ratio	0	10849
176Hf/177Hf	ratio	0.280864	2.1e-05
Z_OG1
Matrix	Zircon
Description	"OG1 Zircon, natural standard"
Data Source	Stern et al. 09, GGR (UPb)
URL
File Path	C:/Program Files (x86)/iolite-software/iolite4/ReferenceMaterials/Z_OG1.json
Notes
Measurement	Units	Value	Uncertainty
Age	ratio	0	3465.4
Pb	ppm	424	0
Th	ppm	120	0
U	ppm	150	0
176Hf/177Hf	ratio	0.280633	3.4e-05
178Hf/177Hf	ratio	1.46717	1.3e-05
206Pb/238U	ratio	0.705	0
207Pb/235U	ratio	29.06	0
207Pb/206Pb	ratio	0.29907	0.00011
206Pb/204Pb	ratio	23712	0
Z_Plesovice
Matrix	Zircon
Description	Plesovice Zircon, natural standard
Data Source	Slama et al., 2008, Chem. Geol. 249, 1-35
URL
File Path	C:/Program Files (x86)/iolite-software/iolite4/ReferenceMaterials/Z_Plesovice.json
Notes
Measurement	Units	Value	Uncertainty
Age	Ma	337	0
206Pb/238U	ratio	0.05368	0
207Pb/235U	ratio	0.394	0
208Pb/232Th	ratio	0	0
207Pb/206Pb	ratio	0.05325	0
206Pb/208Pb	ratio	31.2138	0
206Pb/204Pb	ratio	51930	0
207Pb/204Pb	ratio	0	0
208Pb/204Pb	ratio	0	0
Pb	ppm	39	0
Th	ppm	78	0
U	ppm	755	0
176Hf/177Hf	ratio	0.282482	0
Z_Temora2
Matrix	Zircon
Description	Temora2 Zircon, natural standard
Data Source	Black et al., 2004, Chem. Geol.205, 115-140 and Woodhead & Hergt, 2005 Geostandards 29, 183-195 for Hf data
URL
File Path	C:/Program Files (x86)/iolite-software/iolite4/ReferenceMaterials/Z_Temora2.json
Notes
Measurement	Units	Value	Uncertainty
Age	Ma	417	0
176Hf177Hf	ratio	0.282686	0
206Pb/238U	ratio	0.0667	0
207Pb/235U	ratio	0.5075	0
208Pb/232Th	ratio	0	0
207Pb/206Pb	ratio	0.0552	0
206Pb/208Pb	ratio	0	0
206Pb/204Pb	ratio	0	0
207Pb/204Pb	ratio	0	0
208Pb/204Pb	ratio	0	0
A_Durango
Matrix	in house crystals
Description	Natural durango
Data Source	Mao et al 2016 Econ. Geol
URL
File Path	C:/Program Files (x86)/iolite-software/iolite4/ReferenceMaterials/A_Durango.json
Notes	"GEOREM preferred values. Uncertainties for some major elements have not been included, otherwise 2 sd"
Measurement	Units	Value	Uncertainty
Mg	ppm	120	20
P	ppm	125000	0
Ca	ppm	395000	0
Mn	ppm	95	5
V	ppm	50	0
Cu	ppm	1	0
Zn	ppm	8	5
As	ppm	1300	50
Sr	ppm	500	20
Y	ppm	640	20
Ba	ppm	3	1
La	ppm	3900	100
Ce	ppm	4600	100
Pr	ppm	400	20
Sm	ppm	168	10
Eu	ppm	17	1
Gd	ppm	153	5
Yb	ppm	40	2
W	ppm	0.06	0
Pb	ppm	0.75	0
Th	ppm	270	10
U	ppm	11	5

## Sheet: Data
samples	Name	Ca43_ppm_mean	Ca43_ppm_2SE(int)	Ca43_ppm_LOD_Pettke	Sc45_ppm_mean	Sc45_ppm_2SE(int)	Sc45_ppm_LOD_Pettke	Ti49_ppm_mean	Ti49_ppm_2SE(int)	Ti49_ppm_LOD_Pettke	Y89_ppm_mean	Y89_ppm_2SE(int)	Y89_ppm_LOD_Pettke	Zr90_ppm_mean	Zr90_ppm_2SE(int)	Zr90_ppm_LOD_Pettke	Nb93_ppm_mean	Nb93_ppm_2SE(int)	Nb93_ppm_LOD_Pettke	La139_ppm_mean	La139_ppm_2SE(int)	La139_ppm_LOD_Pettke	Ce140_ppm_mean	Ce140_ppm_2SE(int)	Ce140_ppm_LOD_Pettke	Pr141_ppm_mean	Pr141_ppm_2SE(int)	Pr141_ppm_LOD_Pettke	Nd146_ppm_mean	Nd146_ppm_2SE(int)	Nd146_ppm_LOD_Pettke	Sm147_ppm_mean	Sm147_ppm_2SE(int)	Sm147_ppm_LOD_Pettke	Eu153_ppm_mean	Eu153_ppm_2SE(int)	Eu153_ppm_LOD_Pettke	Gd157_ppm_mean	Gd157_ppm_2SE(int)	Gd157_ppm_LOD_Pettke	Tb159_ppm_mean	Tb159_ppm_2SE(int)	Tb159_ppm_LOD_Pettke	Dy163_ppm_mean	Dy163_ppm_2SE(int)	Dy163_ppm_LOD_Pettke	Ho165_ppm_mean	Ho165_ppm_2SE(int)	Ho165_ppm_LOD_Pettke
700-7020-62.5 - 1	Blue Mountain Granodiorite Suite
700-7020-62.5 - 1	Blue Mountain Granodiorite Suite	BelowLOD	105.507	419.958	362.511	8.90344	0.371007	5.69139	0.869293	0.821077	614.536	16.4771	0.00469054	429339	12837	0.00919879	1.19058	0.0897038	0.00350722	0.00796935	0.00645209	0.00300438	10.418	0.382836	0.00306623	0.0422105	0.0118963	0.00251306	0.75652	0.121237	0.0145489	1.96313	0.222713	0.0171593	0.863267	0.0848753	0.00468532	12.5594	0.662516	0.0165756	4.31623	0.176149	0.002423	51.4518	1.65672	0.00996436	19.7276	0.632124	0.00247057
700-7020-62.5 - 2	Blue Mountain Granodiorite Suite	BelowLOD	123.81	442.998	350.971	9.99761	0.42165	5.9478	0.749658	1.19378	546.881	18.0527	0.0048311	432137	10731.8	0.00947102	0.920534	0.0753506	0.00361274	0.0350896	0.0122636	0.0289278	8.71086	0.319541	0.00315717	0.0798963	0.0199379	0.00258767	1.16333	0.187047	0.0149802	2.55062	0.269513	0.0176705	1.04519	0.0930811	0.00482418	13.9131	0.751698	0.0170636	4.17059	0.204784	0.00249518	48.533	1.69263	0.0102629	17.804	0.585725	0.00254347
7022-670-675 - 1	Blue Mountain Granodiorite Suite	BelowLOD	146.701	420.647	428.221	26.9101	0.412477	7.71299	0.936344	1.08648	1019.74	113.503	0.00472802	428541	11226.6	0.00923601	1.94647	0.189316	0.0035353	0.00321142	0.00366309	0.00302867	16.8574	2.0689	0.0030859	0.0785213	0.0198249	0.00253206	1.15055	0.164516	0.0146358	3.11751	0.469988	0.0172885	1.11032	0.167634	0.00471675	22.932	3.17045	0.0166532	7.2205	0.896699	0.00244357	90.9665	11.0957	0.0100823	33.7351	3.88095	0.00248918
7022-670-675 - 2	Blue Mountain Granodiorite Suite	BelowLOD	116.81	439.689	362.977	8.84065	0.412006	8.52932	0.904331	0.898795	793.465	18.1651	0.00488107	438022	11627.6	0.00953154	0.881909	0.0679103	0.00364902	0.0110602	0.00694585	0.00312725	9.62641	0.302034	0.00318596	0.151001	0.0269284	0.00261462	2.57227	0.296885	0.0151109	4.31116	0.39255	0.0178488	1.64408	0.126456	0.00487007	22.5515	1.26075	0.0171919	6.49088	0.291687	0.00252326	75.0506	2.51446	0.0104142	26.483	0.685097	0.0025708
7022-670-675 - 3	Blue Mountain Granodiorite Suite	BelowLOD	110.171	407.46	407.876	18.1029	0.410174	9.41	1.0698	1.32847	1116.8	85.2315	0.00476548	433747	11776.4	0.390774	1.39427	0.110371	0.00356177	0.0126722	0.00708774	0.00305372	15.4663	1.24417	0.0031107	0.123605	0.0235738	0.00255335	2.49879	0.320922	0.014755	5.00582	0.597893	0.0174265	2.17945	0.222698	0.00475546	30.9756	3.06068	0.0167845	9.08652	0.845308	0.00246412	105.687	8.13034	0.010173	36.9257	2.89304	0.0167909
STDEV & Ave					33.575		0.405463	1.61436		1.06572	247.732		0.00477924	3799.47		0.0856423	0.433606		0.00357321	0.0123282		0.00822836	3.68549		0.00312119	0.0425465		0.00256015	0.844581		0.0148062	1.25241		0.0174787	0.538523		0.00477036	7.52104		0.0168538	2.06815		0.00246983	24.746		0.0101794	8.39019		0.00537298
7005-350-355 - 2	Blue Mountain Granodiorite Suite
7005-350-355 - 2	Blue Mountain Granodiorite Suite	BelowLOD	130.357	417.735	375.557	16.1469	0.414943	4.97389	0.778803	0.898505	908.556	47.7714	0.00465606	389123	24973.8	1.01035	1.77898	0.1503	0.00347231	0.19348	0.0319245	0.0365661	17.378	0.99888	0.00304079	0.171298	0.0248536	0.00249957	1.69377	0.189682	0.0144402	3.24261	0.354627	0.0170228	1.49199	0.13854	0.00465179	20.9931	1.29736	0.0163979	6.89144	0.440546	0.00241143	80.9924	4.89237	0.00996869	29.1816	1.72823	0.00246175
7005-350-355 - 3	Blue Mountain Granodiorite Suite	BelowLOD	136.17	418.254	345.381	24.584	0.402887	934.134	474.096	1.26014	961.608	90.8495	0.0588921	377948	30573.4	0.00935081	2.40788	0.233047	0.00358523	0.370715	0.139999	0.00308515	18.9597	1.68185	0.00314149	0.232502	0.0780474	0.00258307	2.18496	0.432401	0.0149229	3.27842	0.384934	0.0175833	1.57232	0.227192	0.00480649	23.0699	2.50718	0.016939	7.14373	0.738173	0.00249175	83.0543	8.11043	0.0103025	30.4421	2.86326	0.00254471
STDEV& Ave					21.338		0.408915	657.015		1.07932	37.5134		0.0317741	7901.9		0.509849	0.4447		0.00352877	0.125324		0.0198256	1.1184		0.00309114	0.0432779		0.00254132	0.347324		0.0146816	0.0253222		0.0173031	0.0567983		0.00472914	1.46855		0.0166685	0.178397		0.00245159	1.45804		0.0101356	0.891306		0.00250323
7010-345-349 - 1	Blue Mountain Granodiorite Suite
7010-345-349 - 1	Blue Mountain Granodiorite Suite	BelowLOD	118.413	430.135	290.744	11.6455	0.412815	4.06421	0.705873	0.868155	452.261	34.9491	0.0049563	433891	14119.9	1.176	1.08992	0.104799	0.00370492	0.21462	0.0741384	0.0284306	9.01646	0.652143	0.00324207	0.156994	0.0398115	0.00265709	1.45851	0.274908	0.0153834	2.06826	0.301837	0.0181383	0.756398	0.10623	0.0049543	11.4042	1.08922	0.0175342	3.3912	0.294002	0.00256132	39.1032	3.18364	0.0105301	14.0865	1.05266	0.00261319
7010-345-349 - 2	Blue Mountain Granodiorite Suite	BelowLOD	130.983	446.505	358.823	19.1169	0.417808	5.62777	0.796243	1.045	1060.88	114.702	0.0458216	429443	12095.5	0.123149	1.53188	0.122472	0.00366401	0.506131	0.11511	0.0352497	18.7163	1.40133	0.00320475	0.458452	0.0598323	0.00262654	4.37629	0.348547	0.0152062	7.04883	0.790223	0.017932	2.30506	0.301136	0.00489712	32.7314	3.94578	0.0173283	9.39028	1.09798	0.00253214	102.557	11.6334	0.0104116	34.9531	3.88534	0.00258262
STDEV&Ave					48.1397		0.415311	1.10561		0.956578	430.359		0.0253889	3145.15		0.649572	0.312517		0.00368447	0.206129		0.0318402	6.85885		0.00322341	0.213162		0.00264181	2.06319		0.0152948	3.52179		0.0180351	1.09507		0.00492571	15.0806		0.0174312	4.24199		0.00254673	44.8686		0.0104708	14.755		0.00259791
FY-GR2A - 1	Eagle lake Granite
FY-GR2A - 1	Eagle lake Granite	BelowLOD	123.652	429.4	480.746	16.1847	0.395516	4.05839	0.75549	0.946232	1620.3	47.1451	0.00464766	412395	12823.4	0.620038	11.7788	0.342397	0.00347594	0.0136025	0.00785816	0.00297581	56.625	2.91441	0.00303646	0.0828441	0.0175579	0.00248882	1.8424	0.237011	0.0144071	5.37228	0.426657	0.0169971	1.37729	0.131606	0.00463965	32.3299	1.39917	0.0164079	11.4436	0.396864	0.0024001	147.154	4.33925	0.00987359	55.9005	1.45267	0.00244594
FY-GR2A - 2	Eagle lake Granite	BelowLOD	116.465	420.476	386.697	19.3624	0.406778	59.0272	16.3886	0.908763	1537.41	90.0305	0.00469374	386348	20434.5	0.00919548	53.3355	12.4347	0.02424	2.03686	0.603453	0.0030049	33.3479	2.17004	0.00306581	1.61266	0.469144	0.017351	8.70703	2.26269	0.014546	7.61149	1.62036	0.0171635	1.85854	0.33618	0.00468445	26.7419	2.37307	0.0165634	10.3319	0.781094	0.00242363	135.307	8.9246	0.00997235	52.3185	3.13237	0.00246938
FY-GR2A - 5	Eagle lake Granite	BelowLOD	106.654	413.753	472.413	11.4042	0.399616	76.0199	6.71777	1.26751	2996.5	162.582	0.0325455	419638	11636.2	0.0092169	145.548	8.79094	0.00352611	5.04308	0.73211	0.0208396	85.5459	4.39482	0.00307653	6.0894	0.688995	0.00252326	30.5501	3.35547	0.0145919	22.8678	2.13606	0.0172347	6.31758	0.618407	0.00470154	68.5439	5.27952	0.0166066	24.3938	1.66728	0.00243483	293.895	17.2055	0.0100371	104.049	5.70147	0.00247949
FY-GR2A - 6	Eagle lake Granite	BelowLOD	130.189	435.898	444.04	15.3645	0.392046	153.77	73.2818	0.75797	2879.14	51.9378	0.00475091	402163	14962.4	0.00928657	101.513	6.78293	0.00355343	5.11884	0.368167	0.00304235	66.2611	2.09545	0.00310066	5.61131	0.389388	0.00254339	30.1544	2.13981	0.0147059	23.4199	1.57243	0.0173706	6.07081	0.376582	0.00473868	65.4693	2.73751	0.0167354	23.9679	0.733702	0.00245437	292.457	5.86894	0.0101207	103.104	1.81149	0.00249956
FY-GR2A - 7	Eagle lake Granite	BelowLOD	118.748	413.994	514.722	25.1667	0.404406	36.5618	5.92835	1.20697	4090.68	389.832	0.0328194	405993	12260.9	0.830466	101.363	14.0583	0.00355501	7.76475	1.3267	0.00304456	106.564	11.8824	0.00310249	8.58916	1.53297	0.00254527	42.3378	7.28221	0.0147144	34.3621	5.69	0.0173813	8.84716	1.43799	0.00474177	104.322	13.2562	0.11561	36.544	4.28366	0.00245626	432.333	46.1324	0.0101316	144.726	14.0229	0.00250175
FY-GR1A - 1	Eagle lake Granite	BelowLOD	115.04	418.982	286.498	7.27583	0.422178	30.7079	1.87728	1.18988	287.787	6.08489	0.00479271	430730	12178.9	0.00931093	0.596396	0.0614309	0.00357072	BelowLOD	0.00931206	0.0203613	5.77941	0.284832	0.00313065	0.0684529	0.0165356	0.0170524	1.32655	0.17788	0.0148762	2.02381	0.236758	0.0175191	1.02746	0.0785077	0.00479057	9.09371	0.584602	0.0168786	2.43694	0.120264	0.00248361	27.9978	0.873215	0.0102705	9.55611	0.265615	0.00253739
FY-GR1A - 3	Eagle lake Granite	BelowLOD	130.437	395.906	447.882	34.9443	0.395056	230.258	86.5194	1.04869	3698.5	410.287	0.00480635	332263	34842.5	0.00932342	77.5278	7.19805	0.0035771	3.48951	0.602813	0.00308395	40.2251	4.57251	0.00314022	2.84189	0.474999	0.00258432	13.296	2.1996	0.0149321	11.1577	1.58851	0.017565	2.70859	0.380358	0.0318319	48.8721	5.78964	0.0169261	22.4531	2.51676	0.00249213	323.19	35.8465	0.0103087	128.751	14.9409	0.00254819
STDEV&Ave					75.7862		0.402228	80.028		1.04657	1349.66		0.0127223	32360.7		0.213834	52.0012		0.00649975	2.7008		0.00805035	33.711		0.00309326	3.2784		0.00672691	16.0438		0.014682	11.8156		0.0173188	3.03085		0.0085898	31.7744		0.0308182	11.4		0.00244928	137.832		0.0101021	47.9182		0.00249739
[truncated: 27 more columns]

## Sheet: QAQC
Secondary Check
Default Accuracy Alarm Value	20
Default Accuracy Warning Value	15
Default Variation Alarm Value	30
Default Variation Warning Value	25
MaskBelowLOD	true
RefMat	Z_91500
exceptions	{ }
Channel	Element	Measured	Accepted	% Diff	Variation (%RSD)	Minimum	Maximum	&#60; LOD	Calibrant
Y89_ppm	Y	124.754	140	-10.89	12.25	115.419	133.688	No	G_NIST610
Nb93_ppm	Nb	0.901184	0.79	14.07	8.17	0.864023	0.93471	No	G_NIST610
La139_ppm	La	0.00154575	0.006	-74.24	446.11	-0.00295807	0.00504477	Yes	G_NIST610
Ce140_ppm	Ce	2.2253	2.6	-14.41	3.71	2.18185	2.26968	No	G_NIST610
Pr141_ppm	Pr	0.00551152	0.024	-77.04	141.91	-8.32043e-20	0.00908482	No	G_NIST610
Nd146_ppm	Nd	0.160155	0.24	-33.27	15.27	0.144452	0.171428	No	G_NIST610
Sm147_ppm	Sm	0.289858	1	-71.01	5.07	0.280245	0.297028	No	G_NIST610
Eu153_ppm	Eu	0.209521	0.24	-12.7	29.59	0.175924	0.24169	No	G_NIST610
Gd157_ppm	Gd	1.9617	2.2	-10.83	23.69	1.75556	2.18326	No	G_NIST610
Tb159_ppm	Tb	0.732031	0.86	-14.88	9.75	0.696055	0.774855	No	G_NIST610
Dy163_ppm	Dy	10.1479	12	-15.43	13.02	9.22027	10.7317	No	G_NIST610
Ho165_ppm	Ho	4.16105	4.8	-13.31	14.35	3.7836	4.51289	No	G_NIST610
Er166_ppm	Er	22.9205	25	-8.32	9.37	21.5688	24.1919	No	G_NIST610
Tm169_ppm	Tm	5.60297	6.9	-18.8	9.19	5.23141	5.82295	No	G_NIST610
Yb172_ppm	Yb	57.3365	74	-22.52	13.85	52.6188	62.2737	No	G_NIST610
Lu175_ppm	Lu	12.1698	13	-6.39	12.54	11.2479	13.0625	No	G_NIST610
Hf178_ppm	Hf	5408.55	5900	-8.33	3.58	5294.41	5490.86	No	G_NIST610
Ta181_ppm	Ta	0.438859	1	-56.11	7.7	0.42054	0.457005	No	G_NIST610
Pb208_ppm	Pb	2.79045	15	-81.4	10.18	2.67578	2.99654	No	G_NIST610
Th232_ppm	Th	25.8917	30	-13.69	11.98	23.6388	26.9584	No	G_NIST610
U238_ppm	U	72.0813	80	-9.9	9.62	66.9944	74.3097	No	G_NIST610
Sum of Abs % Diffs

## Sheet: Things to cite
Woodhead, J., Hellstrom, J., Hergt, J., Greig, A. & Maas, R (2007) Isotopic and elemental imaging of geological materials by laser ablation Inductively Coupled Plasma mass spectrometry. Journal of Geostandards and Geoanalytical Research, 31, p. 331-343.
Paton, C., Hellstrom, J., Paul, B.,Woodhead, J. and Hergt, J. (2011) Iolite: Freeware for the visualisation and processing of mass spectrometric data. Journal of Analytical Atomic Spectrometry. doi:10.1039/c1ja10172b.
